# Supplementary material
Source: publisher site journal article supplement (http://kjim.org/upload/media/kjim-2021-101-suppl4.pdf)
Supplement: Supplementary file 1 [file kjim-2021-101-suppl4.pdf]

**Supplementary Table 4. Baseline clinical, angiographic, and procedural characteristics and in-hospital medications of patients with or without LD in both the C-P and the P-C groups**

| Characteristics                           | The C-P (n = 867)  |                 |                | The P-C (n = 532)  |               |                |
|-------------------------------------------|--------------------|-----------------|----------------|--------------------|---------------|----------------|
|                                           | No LD<br>(n = 669) | LD<br>(n = 198) | <i>p</i> value | No LD<br>(n = 428) | LD<br>(n=104) | <i>p</i> value |
| Age, yr                                   | 61.19 ± 0.47       | 59.57 ± 0.76    | 0.071          | 64.65 ± 0.60       | 62.36 ± 1.26  | 0.095          |
| Age ≥ 75 years                            | 95 (14.2)          | 20 (10.1)       | 0.153          | 109 (25.5)         | 19 (18.3)     | 0.159          |
| Male gender                               | 537 (80.3)         | 166 (83.8)      | 0.302          | 305 (71.3)         | 78 (75.0)     | 0.468          |
| Hypertension                              | 338 (50.5)         | 96 (48.5)       | 0.628          | 200 (46.7)         | 46 (44.2)     | 0.663          |
| Diabetes                                  | 179 (26.8)         | 43 (21.7)       | 0.165          | 104 (24.3)         | 34 (32.7)     | 0.082          |
| Dyslipidemia                              | 76 (11.4)          | 20 (10.1)       | 0.700          | 31 (7.2)           | 14 (13.5)     | 0.049          |
| Current smoker                            | 291 (43.5)         | 101 (51.0)      | 0.074          | 157 (36.7)         | 46 (44.2)     | 0.177          |
| Family history of coronary artery disease | 36 (5.4)           | 13 (6.6)        | 0.489          | 28 (6.5)           | 5 (4.8)       | 0.653          |
| Previous history of angina                | 61 (9.1)           | 17 (8.6)        | 0.888          | 36 (8.4)           | 5 (4.8)       | 0.304          |
| Previous history of heart failure         | 16 (2.4)           | 1 (0.5)         | 0.093          | 5 (1.2)            | 3 (2.9)       | 0.197          |
| Previous history of MI                    | 76 (11.4)          | 19 (9.6)        | 0.520          | 27 (6.3)           | 6 (5.8)       | 1.000          |
| Previous history of CVA                   | 26 (3.9)           | 14 (7.1)        | 0.080          | 19 (4.4)           | 6 (5.8)       | 0.605          |
| Killip class                              |                    |                 | 0.448          |                    |               | 0.008          |
| I                                         | 555 (83.0)         | 169 (85.4)      |                | 355 (85.5)         | 77 (74.0)     |                |
| II–IV                                     | 114 (17.0)         | 29 (14.6)       |                | 62 (14.5)          | 27 (26.0)     |                |
| Final diagnosis                           |                    |                 | 1.000          |                    |               | 0.049          |
| Non-ST segment elevation MI               | 354 (52.9)         | 105 (53.0)      |                | 188 (43.9)         | 57 (54.8)     |                |
| ST segment elevation MI                   | 315 (47.1)         | 93 (47.0)       |                | 240 (56.1)         | 47 (45.2)     |                |
| LV ejection fraction, %                   | 52.26 ± 0.42       | 53.07 ± 0.72    | 0.356          | 51.56 ± 0.51       | 51.83 ± 1.17  | 0.836          |
| Creatinine clearance, mL/min              | 85.56 ± 1.51       | 90.70 ± 2.32    | 0.064          | 76.96 ± 1.67       | 87.40 ± 4.59  | 0.034          |
| Vascular access                           |                    |                 | 0.686          |                    |               | 0.063          |
| Transradial approach                      | 333 (49.8)         | 102 (51.5)      |                | 223 (52.1)         | 43 (41.3)     |                |
| Transfemoral approach                     | 336 (50.2)         | 96 (48.5)       |                | 205 (47.9)         | 61 (58.7)     |                |
| Infarct-related artery                    |                    |                 | 0.398          |                    |               | 0.608          |
| Left anterior descending                  | 319 (47.7)         | 91 (46.0)       |                | 208 (48.6)         | 46 (44.2)     |                |
| Left circumflex                           | 98 (14.6)          | 37 (18.7)       |                | 66 (15.4)          | 15 (14.4)     |                |
| Right coronary                            | 233 (34.8)         | 62 (31.3)       |                | 148 (34.6)         | 40 (38.5)     |                |
| Left main                                 | 19 (2.8)           | 8 (4.0)         |                | 6 (1.4)            | 3 (2.9)       |                |
| Involved vessel number                    |                    |                 | 1.000          |                    |               | 0.028          |
| Single vessel                             | 326 (48.7)         | 97 (49.0)       |                | 243 (56.8)         | 46 (44.2)     |                |
| Left main or multi-vessel disease         | 343 (51.3)         | 101 (51.0)      |                | 185 (43.2)         | 58 (55.8)     |                |
| ACC/AHA lesion classification             |                    |                 | 0.073          |                    |               | 0.486          |
| Type A/B1                                 | 83 (12.4)          | 15 (7.6)        |                | 50 (11.7)          | 9 (8.7)       |                |
| Type B2/C                                 | 586 (87.6)         | 183 (92.4)      |                | 378 (88.3)         | 95 (91.3)     |                |
| Procedure for target lesion               |                    |                 | 0.470          |                    |               | 0.081          |
| Only balloon angioplasty                  | 32 (4.8)           | 10 (5.1)        |                | 28 (6.5)           | 2 (1.9)       |                |
| Bare metal stent                          | 21 (3.1)           | 3 (1.5)         |                | 10 (2.3)           | 5 (4.8)       |                |
| Drug-eluting stent                        | 616 (92.1)         | 185 (93.4)      |                | 390 (91.1)         | 97 (93.3)     |                |

Supplementary Table 4. Continued

| Characteristics                        | The C-P (n = 867)  |                 |                | The P-C (n = 532)  |               |                |
|----------------------------------------|--------------------|-----------------|----------------|--------------------|---------------|----------------|
|                                        | No LD<br>(n = 669) | LD<br>(n = 198) | <i>p</i> value | No LD<br>(n = 428) | LD<br>(n=104) | <i>p</i> value |
| Use of glycoprotein IIb/IIIa inhibitor | 120 (17.9)         | 37 (18.7)       | 0.834          | 62 (14.5)          | 19 (18.3)     | 0.361          |
| In-hospital medications                |                    |                 |                |                    |               |                |
| Aspirin                                | 666 (99.6)         | 198 (100.0)     | 0.345          | 428 (100.0)        | 104 (100.0)   | -              |
| Clopidogrel                            | 669 (100.0)        | 198 (100.0)     | -              | 428 (100.0)        | 104 (100.0)   | -              |
| Ticagrelor                             | 365 (54.6)         | 138 (69.7)      | < 0.001        | 327 (76.4)         | 64 (61.5)     | 0.003          |
| Prasugrel                              | 304 (45.4)         | 60 (30.3)       | < 0.001        | 101 (23.6)         | 40 (38.5)     | 0.003          |
| Cilostazol                             | 13 (1.9)           | 4 (2.0)         | 0.945          | 22 (5.1)           | 3 (2.9)       | 0.330          |
| Beta-blocker                           | 581 (86.8)         | 169 (85.4)      | 0.636          | 333 (77.8)         | 84 (80.8)     | 0.596          |
| Calcium channel blockers               | 31 (4.6)           | 16 (8.1)        | 0.073          | 27 (6.3)           | 3 (2.9)       | 0.175          |
| ACEi or ARB                            | 540 (80.7)         | 166 (83.8)      | 0.350          | 314 (73.4)         | 87 (83.7)     | 0.031          |
| Statin                                 | 635 (94.9)         | 189 (95.5)      | 0.854          | 400 (93.5)         | 99 (95.2)     | 0.653          |
| Oral anticoagulants                    | 6 (0.9)            | 2 (1.0)         | 0.884          | 30 (7.0)           | 8 (7.7)       | 0.832          |

Values are presented as mean ± standard error of mean or number (%).

LD, loading dosage; C-P, from clopidogrel to potent P2Y12 receptor inhibitor (RI); P-C, from potent P2Y12RI to clopidogrel; MI, myocardial infarction; CVA, cerebrovascular accident; LV, left ventricular; ACC, American College of Cardiology; AHA, American Heart Association; ACEi, angiotensin converting enzyme inhibitor; ARB, angiotensin II receptor blocker.
